CORRECTION

# Correction: Detection and Characterization of Metastatic Cancer Cells in the Mesogastrium of Gastric Cancer Patients

The *PLOS ONE* Staff

Daxing Xie is incorrectly designated as the corresponding author. The correct corresponding author is Jianping Gong. Jianping Gong's email address is: [jpgong@tjh.tjmu.edu.cn](mailto:jpgong@tjh.tjmu.edu.cn). The publisher apologizes for the error.

## Reference

1. Xie D, Liu L, Osaiweran H, Yu C, Sheng F, Gao C, et al. (2015) Detection and Characterization of Metastatic Cancer Cells in the Mesogastrium of Gastric Cancer Patients. PLoS ONE 10(11): e0142970. doi:[10.1371/journal.pone.0142970](https://doi.org/10.1371/journal.pone.0142970) PMID: [26566136](https://pubmed.ncbi.nlm.nih.gov/26566136/)

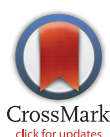

## OPEN ACCESS

**Citation:** The *PLOS ONE* Staff (2016) Correction: Detection and Characterization of Metastatic Cancer Cells in the Mesogastrium of Gastric Cancer Patients. PLoS ONE 11(1): e0148681. doi:[10.1371/journal.pone.0148681](https://doi.org/10.1371/journal.pone.0148681)

**Published:** January 29, 2016

**Copyright:** © 2016 The PLOS ONE Staff. This is an open access article distributed under the terms of the [Creative Commons Attribution License](https://creativecommons.org/licenses/by/4.0/), which permits unrestricted use, distribution, and reproduction in any medium, provided the original author and source are credited.
